# Supplementary material
Source: MDPI journal article supplement (https://www.mdpi.com/2077-0472/10/4/100)
Supplement: s1 [file s1]

**Table S1.** Breeding year and breeding organizations of soybean varieties used in this study.

| Breeding    | Organization       |                    |            |                         |         | Total |
|-------------|--------------------|--------------------|------------|-------------------------|---------|-------|
|             | NICS <sup>1)</sup> | ARES <sup>2)</sup> | University | Institute <sup>3)</sup> | Private |       |
| Before 1980 | 18                 | -                  | -          | -                       | -       | 18    |
| 1980s       | 17                 | -                  | -          | -                       | -       | 17    |
| 1990s       | 40                 | 3                  | -          | -                       | -       | 43    |
| 2000–2013   | 64                 | 9                  | 13         | 3                       | 5       | 94    |
| Total       | 139                | 12                 | 13         | 3                       | 5       | 172   |

<sup>1)</sup>NICS: National Institute of Crop Science, Rural Development Administration. <sup>2)</sup>ARES: Agricultural Research & Extension Service. <sup>3)</sup>Korea Atomic Energy Research Institute.

**Table S2.** Analytical conditions of HPLC for Lutein.

| Parameter        | Condition                                                                                          |
|------------------|----------------------------------------------------------------------------------------------------|
| Instrument       | Waters 600 pump & controller,<br>Waters 717 autosampler,<br>Waters 486 tunable absorbance detector |
| Wavelength       | 290nm                                                                                              |
| Mobile phase     | Acetonitrile: Ethyl acetate = Acetonitrile 70 → 0% /<br>27 min, Acetonitrile 0 → 70% / 50 min      |
| Flow rate        | 1.0 mL/min                                                                                         |
| Injection volume | 20 $\mu$ l                                                                                         |
| Column           | YMC-PACK Pro C18 column (250 $\times$ 4.6mm)                                                       |

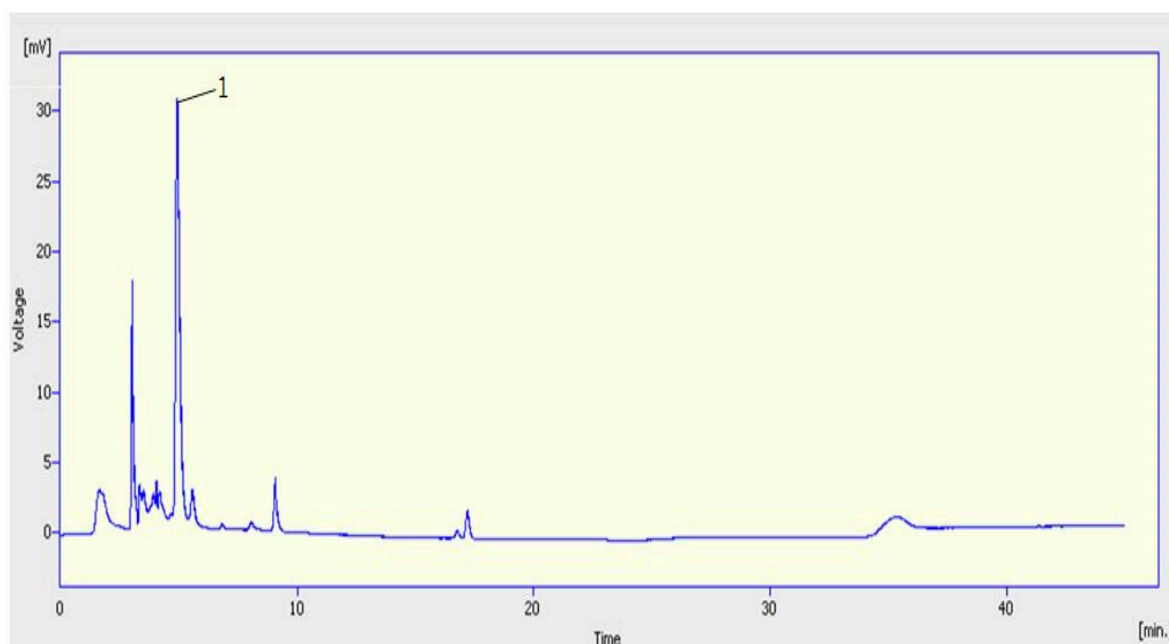

**Figure S1.** HPLC chromatogram patterns of soybean Lutein. Peak: 1, Lutein

**Table S3.** Calibration equations of lutein standard.

| Composition | Equation of linear regression | Coefficient of determination(R <sup>2</sup> ) | Linearity range (µg/g) |
|-------------|-------------------------------|-----------------------------------------------|------------------------|
| Lutein      | $y = 162.16x + 15.296$        | 0.998                                         | 0.39–3.13              |

**Table S4.** Analytical conditions of HPLC for tocopherol.

| Parameter        | Condition                                                                                    |
|------------------|----------------------------------------------------------------------------------------------|
| Instrument       | Waters 600 pump & controller, Waters 717 autosampler, Waters 486 tunable absorbance detector |
| Wavelength       | 290 nm                                                                                       |
| Mobile phase     | Hexane with 1.1% IPA(isopropanol)                                                            |
| Flow rate        | 1.0 mL/min                                                                                   |
| Injection volume | 20 µl                                                                                        |
| Column           | Lichrospher 100 Diol column (250 × 4.6mm)                                                    |

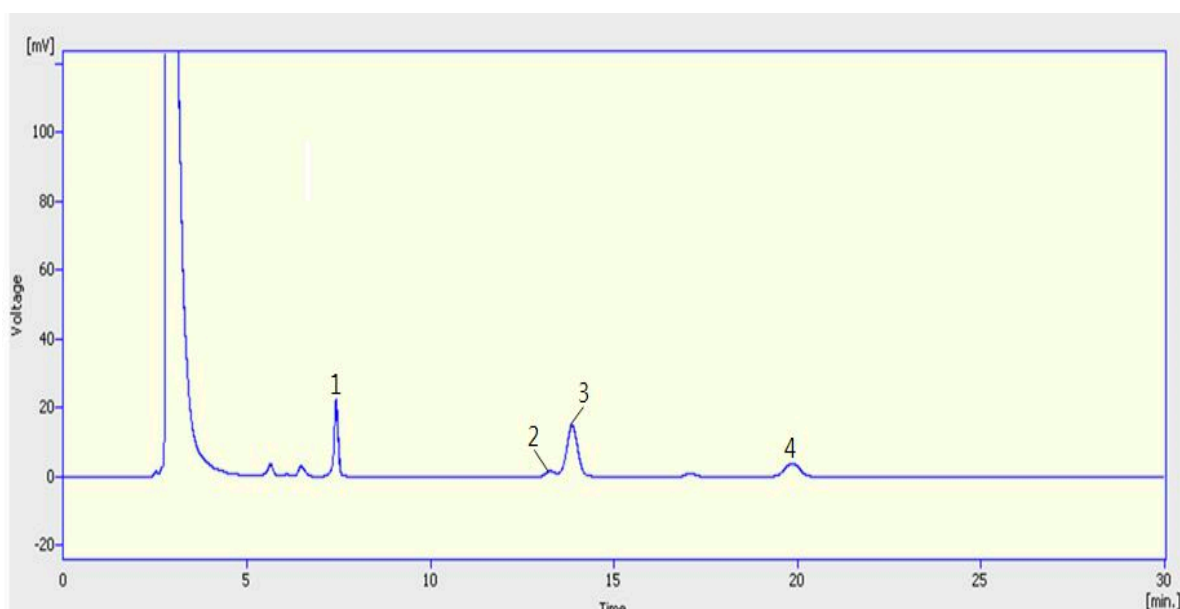**Figure S2.** HPLC chromatogram patterns of soybean tocopherols. Peak: 1,  $\alpha$ -Tocopherol; 2,  $\beta$ -Tocopherol; 3,  $\gamma$ -Tocopherol; 4,  $\delta$ -Tocopherol.**Table S5.** Calibration equations of tocopherol standards.

| Composition          | Equation of linear regression | Coefficient of determination (R <sup>2</sup> ) | Linearity range (µg/g) |
|----------------------|-------------------------------|------------------------------------------------|------------------------|
| $\alpha$ -tocopherol | $y = 7.7506x + 13.322$        | 0.999                                          | 9.44–75.5              |
| $\beta$ -tocopherol  | $y = 8.1738x + 5.7907$        | 0.983                                          | 1.96–15.69             |
| $\gamma$ -tocopherol | $y = 5.6284x - 55.114$        | 0.999                                          | 19.37–154.94           |
| $\delta$ -tocopherol | $y = 5.2577x - 19.981$        | 0.998                                          | 6.18–49.48             |

**Table S6.** Analytical conditions of GC for phytosterols.

| Parameter            | Condition                                                                |
|----------------------|--------------------------------------------------------------------------|
| Column               | HP-5 19091J-413<br>(30m × 0.32mm) 0.25 $\mu$ m                           |
| Oven temperature     | From 200 °C to 320 °C increasing 6 °C/min                                |
| Injector temperature | 280 °C                                                                   |
| Detector             | 290 °C, H2 flow rate 30, air flow rate 450,<br>N2 as a makeup flow 45 °C |
| Carrier gas          | He(99.9999%)                                                             |
| Flow rate            | 1.0 mL/min                                                               |

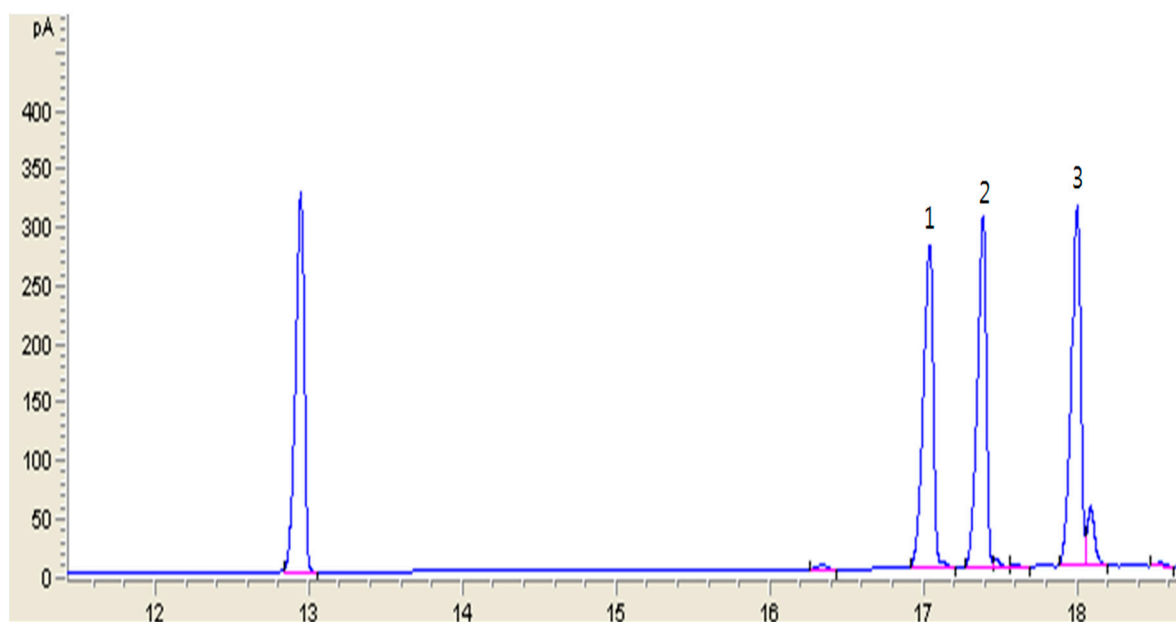**Figure S3.** GC chromatogram patterns of seed phytosterols. Peak: 1, campesterol 2, stigmasterol 3,  $\beta$ -sitosterol.**Table S7.** Calibration equations of phytosterol standards.

| Composition         | Equation of linear regression | Coefficient of determination (R <sup>2</sup> ) | Linearity range ( $\mu$ g/g) |
|---------------------|-------------------------------|------------------------------------------------|------------------------------|
| Campesterol         | $y = 4.601x + 45.125$         | 0.999                                          | 31.25–500                    |
| Stigmasterol        | $y = 4.665x + 55.771$         | 0.999                                          | 31.25–500                    |
| $\beta$ -sitosterol | $y = 5.5292x + 23.083$        | 0.999                                          | 31.25–500                    |

**Table S9.** Principal component analysis in 172 Korean soybean varieties.

| Principal component | Eigenvalue | Contribution (%) | Cumulative contribution (%) |
|---------------------|------------|------------------|-----------------------------|
| PC1                 | 3.270      | 32.70            | 32.70                       |
| PC2                 | 2.879      | 28.79            | 61.49                       |
| PC3                 | 1.344      | 13.44            | 74.93                       |
| PC4                 | 0.983      | 9.83             | 84.76                       |
| PC5                 | 0.671      | 6.71             | 91.47                       |
| PC6                 | 0.440      | 4.40             | 95.87                       |
| PC7                 | 0.256      | 2.56             | 98.43                       |
| PC8                 | 0.157      | 1.57             | 100                         |
| PC9                 | 0.000      | 0                | 100                         |
| PC10                | 0.000      | 0                | 100                         |

**Table S10.** Correlation coefficients between phytochemicals and principal components in 172 Korean soybean varieties.

| Phytochemical        | PC1       | PC2      | PC3       |
|----------------------|-----------|----------|-----------|
| Lutein               | 0.101     | 0.220 ** | -0.180 *  |
| $\alpha$ -tocopherol | 0.429 **  | 0.344 ** | 0.682 **  |
| $\beta$ -tocopherol  | 0.310 **  | 0.256 ** | 0.806 **  |
| $\gamma$ -tocopherol | 0.613 **  | 0.678 ** | -0.315 ** |
| $\delta$ -tocopherol | 0.598 **  | 0.616 ** | -0.236 ** |
| Total tocopherol     | 0.675 **  | 0.711 ** | -0.159 *  |
| $\beta$ -sitosterol  | -0.706 ** | 0.520 ** | -0.015    |
| Campesterol          | -0.678 ** | 0.590 ** | 0.119     |
| Stigmsterol          | -0.500 ** | 0.531 ** | -0.008    |
| Total phytosterol    | -0.765 ** | 0.634 ** | 0.021     |
